# Supplementary material for: Variation pattern of particulate organic carbon andnitrogen in oceans and inland waters
Source: Copernicus journal article supplement (doi:10.5194/bg-2017-68), 2017-03-10

# Supporting information

## Variation pattern of particulate organic carbon and nitrogen in oceans and inland waters

Changchun Huang<sup>1,2,3,\*</sup>, Lin, Yao<sup>4</sup>, Hao Yang<sup>1,3</sup>, Chen Lin<sup>5</sup>, Tao Huang<sup>1,3</sup>, Mingli Zhang<sup>1</sup>, A-xing Zhu<sup>1,2,6</sup>, Yimin Zhang<sup>3</sup>

1 Jiangsu Center for Collaborative Innovation in Geographical Information Resource Development and Application, Nanjing Normal University, Nanjing 210023, China

2 Key Laboratory of Virtual Geographic Environment (Nanjing Normal University), Ministry of Education, Nanjing 210023, China

3 School of geography science, Nanjing Normal University, Nanjing 210023, China

4 State Key Laboratory of Resources and Environmental Information System, Institute of Geographic Sciences and Natural Resources Research, Chinese Academy of Sciences

5 Key Laboratory of Watershed Geographic Sciences, Institute of Geography and Limnology, Chinese Academy of Sciences, Nanjing 210008, China

6 Department of Geography, University of Wisconsin, Madison, Wisconsin 53706, USA

*Correspondence to:* Changchun Huang (huangchangchun\_aaa@163.com)

**Supporting information introduction:** Supporting information includes six tables and two figures.

Table S1 Data information and sources for POC, PON and corresponding dissolved organic carbon (DOC), dissolved organic nitrogen (DON), chlorophyll-a and total suspended matter.

### Ocean Database

| Ocean datasets         | location                       | Data link and description                                                                     |
|------------------------|--------------------------------|-----------------------------------------------------------------------------------------------|
| Marine POM             | Global Ocean                   | <a href="http://dx.doi.org/10.5061/dryad.d702p/3">http://dx.doi.org/10.5061/dryad.d702p/3</a> |
| Cruise NBP1302         | Rose Sea                       | <a href="http://www.bco-dmo.org/dataset/658394">http://www.bco-dmo.org/dataset/658394</a>     |
| Cruise VDT0410         | South East of New Zealand      | <a href="http://www.bco-dmo.org/dataset/3329">http://www.bco-dmo.org/dataset/3329</a>         |
| Cruise KN199-04        | N. Atlantic Ocean              | <a href="http://www.bco-dmo.org/dataset/3851">http://www.bco-dmo.org/dataset/3851</a>         |
| Cruises LMG 0414- 0602 | Southern Ocean                 | <a href="http://www.bco-dmo.org/dataset/3035">http://www.bco-dmo.org/dataset/3035</a>         |
| Cruise IronEx II       | Pacific Ocean                  | <a href="http://www.bco-dmo.org/dataset/3152">http://www.bco-dmo.org/dataset/3152</a>         |
| Cruise RB-08-02        | Southwest Atlantic             | <a href="http://www.bco-dmo.org/dataset/3304">http://www.bco-dmo.org/dataset/3304</a>         |
| Cruise MV1008          | Eastern Tropical Pacific Ocean | <a href="http://www.bco-dmo.org/dataset/516495">http://www.bco-dmo.org/dataset/516495</a>     |
| Cruises KY0103-01-02   | Sub-Arctic Pacific Ocean       | <a href="http://www.bco-dmo.org/dataset/2907">http://www.bco-dmo.org/dataset/2907</a>         |

|                                |                             |                                                                                                                                                     |
|--------------------------------|-----------------------------|-----------------------------------------------------------------------------------------------------------------------------------------------------|
| Cruise NH1008                  | Monterey Bay                | <a href="http://www.bco-dmo.org/dataset/3725">http://www.bco-dmo.org/dataset/3725</a>                                                               |
| Cruise 61TG_3052               | Southern Ocean              | <a href="http://www.bco-dmo.org/dataset/2866">http://www.bco-dmo.org/dataset/2866</a>                                                               |
| Cruise M80/2                   | North Atlantic Ocean        | <a href="https://doi.pangaea.de/10.1594/PANGAEA.843427">https://doi.pangaea.de/10.1594/PANGAEA.843427</a>                                           |
| Cruise PS79                    | Atlantic Ocean              | <a href="https://doi.pangaea.de/10.1594/PANGAEA.848818">https://doi.pangaea.de/10.1594/PANGAEA.848818</a>                                           |
| Dünweber, 2010                 | Arctic Ocean                | <a href="https://doi.pangaea.de/10.1594/PANGAEA.809471">https://doi.pangaea.de/10.1594/PANGAEA.809471</a>                                           |
| Cruise PS69/001                | Pacific and Atlantic Oceans | <a href="https://doi.pangaea.de/10.1594/PANGAEA.759667">https://doi.pangaea.de/10.1594/PANGAEA.759667</a>                                           |
| Cruise SS2010v09               | Pacific Oceans              | <a href="https://doi.pangaea.de/10.1594/PANGAEA.843554">https://doi.pangaea.de/10.1594/PANGAEA.843554</a>                                           |
| Cruise M97                     | Atlantic Ocean              | <a href="https://doi.pangaea.de/10.1594/PANGAEA.863119">https://doi.pangaea.de/10.1594/PANGAEA.863119</a>                                           |
| SBC LTER                       | Santa Barbara Coastal       | <a href="https://pasta.lternet.edu/package/metadata/eml/knb-lter-sbc/10/21">https://pasta.lternet.edu/package/metadata/eml/knb-lter-sbc/10/21</a>   |
| Palmer Station Antarctica LTER | West Antarctica             | <a href="https://pasta.lternet.edu/package/metadata/eml/knb-lter-sbc/215/01">https://pasta.lternet.edu/package/metadata/eml/knb-lter-sbc/215/01</a> |
| Cruise CalCOFI                 | North Atlantic Ocean        | <a href="https://pasta.lternet.edu/package/metadata/eml/knb-lter-cce/54/1">https://pasta.lternet.edu/package/metadata/eml/knb-lter-cce/54/1</a>     |
| Cruise CCE Process             | North Atlantic Ocean        | <a href="https://pasta.lternet.edu/package/metadata/eml/knb-lter-cce/104/1">https://pasta.lternet.edu/package/metadata/eml/knb-lter-cce/104/1</a>   |
| MCR LTER                       | North Atlantic Ocean        | <a href="https://pasta.lternet.edu/package/metadata/eml/knb-lter-mcr/104/1">https://pasta.lternet.edu/package/metadata/eml/knb-lter-mcr/104/1</a>   |
| Cruise NBP01-02                | Pacific and Atlantic Oceans | <a href="ftp://ftp.nodc.noaa.gov/nodc/archive/arc0060/0112164/">ftp://ftp.nodc.noaa.gov/nodc/archive/arc0060/0112164/</a>                           |
| Cruise OC404                   | Atlantic Ocean              | <a href="ftp://ftp.nodc.noaa.gov/nodc/archive/arc0037/0078011/">ftp://ftp.nodc.noaa.gov/nodc/archive/arc0037/0078011/</a>                           |
| Cruise WB0508                  | Atlantic Ocean              | <a href="ftp://ftp.nodc.noaa.gov/nodc/archive/arc0042/0086459/">ftp://ftp.nodc.noaa.gov/nodc/archive/arc0042/0086459/</a>                           |
| Cruise WB0506                  | Atlantic Ocean              | <a href="ftp://ftp.nodc.noaa.gov/nodc/archive/arc0042/0086459/">ftp://ftp.nodc.noaa.gov/nodc/archive/arc0042/0086459/</a>                           |
| Cruise WB0409                  | Atlantic Ocean              | <a href="ftp://ftp.nodc.noaa.gov/nodc/archive/arc0042/0086459/">ftp://ftp.nodc.noaa.gov/nodc/archive/arc0042/0086459/</a>                           |
| Cruise WB0413                  | Atlantic Ocean              | <a href="ftp://ftp.nodc.noaa.gov/nodc/archive/arc0042/0086459/">ftp://ftp.nodc.noaa.gov/nodc/archive/arc0042/0086459/</a>                           |
| Cruise WCOA11                  | North Atlantic Ocean        | <a href="ftp://ftp.nodc.noaa.gov/nodc/archive/arc0072/0123607/">ftp://ftp.nodc.noaa.gov/nodc/archive/arc0072/0123607/</a>                           |
| Cruise WCOA2011                | Pacific Ocean               | <a href="https://www.nodc.noaa.gov/archive/arc0093/0155173/1.1/data/0-data/">https://www.nodc.noaa.gov/archive/arc0093/0155173/1.1/data/0-data/</a> |
| Lecture data                   | Ocean and Coastal           | Sterner et al., 2008                                                                                                                                |
| Lecture data                   | China sea                   | Cai, P.H. et al., 2015                                                                                                                              |
| Lecture data                   | northern Adriatic Sea       | Salvi et al., 1998                                                                                                                                  |
| Lecture data                   | Columbia River Estuary      | Small and Prahl, 2004                                                                                                                               |

## Lake Database

| Lake datasets          | location                  | Data link and description                                                                                                                             |
|------------------------|---------------------------|-------------------------------------------------------------------------------------------------------------------------------------------------------|
| Lacustrine Communities | Lacustrine Central Group  | <a href="https://pasta.lternet.edu/package/metadata/eml/knb-lter-cdr/579/5">https://pasta.lternet.edu/package/metadata/eml/knb-lter-cdr/579/5</a>     |
| NWT LTER               | Green Lake                | <a href="https://pasta.lternet.edu/package/metadata/eml/knb-lter-nwt/107/8">https://pasta.lternet.edu/package/metadata/eml/knb-lter-nwt/107/8</a>     |
| MCML LTER              | McMurdo Dry Valleys Lakes | <a href="https://pasta.lternet.edu/package/metadata/eml/knb-lter-mcm/57/9">https://pasta.lternet.edu/package/metadata/eml/knb-lter-mcm/57/9</a>       |
| WPlum Island LTER      | Ipawich and Parker river  | <a href="https://pasta.lternet.edu/package/metadata/eml/knb-lter-sbc/108/6">https://pasta.lternet.edu/package/metadata/eml/knb-lter-sbc/108/6</a>     |
| NTL LTER               | Great Lakes Group         | <a href="https://pasta.lternet.edu/package/metadata/eml/knb-lter-ntl/278/6">https://pasta.lternet.edu/package/metadata/eml/knb-lter-ntl/278/6</a>     |
| Arctic LTER            | Alaskan Lakes             | <a href="https://pasta.lternet.edu/package/metadata/eml/knb-lter-arc/10090/3">https://pasta.lternet.edu/package/metadata/eml/knb-lter-arc/10090/3</a> |
| Water/Soil Environment | Lake Kasumigaura          | <a href="http://www.nies.go.jp/db/index-e.html">http://www.nies.go.jp/db/index-e.html</a>                                                             |
| Lecture data           | Northern American Lakes   | Sterner et al., 2008                                                                                                                                  |

|              |                 |                      |
|--------------|-----------------|----------------------|
| Lecture data | Norwegian Lakes | Sterner et al., 2008 |
| Lecture data | Hokkaido Lakes  | Sterner et al., 2008 |
| Lecture data | Biwa Lake       | Sterner et al., 2008 |
| Lecture data | Hovsgol Lake    | Sterner et al., 2008 |
| Lecture data | Baikal Lake     | Sterner et al., 2008 |
| Lecture data | Skidaway River  | Verity, 2002         |
| Lecture data | Taihu Lake      | This study           |

Table S2 Relationship between PON and POC for each latitudinal range. Three mathematical functions were used to fit the relationship between PON and POC. The parameters and determined coefficients of each function are listed in the table. The  $R^2$  with \* marked is the best regression function for the POC and PON.

| Items        | POC= $A_0 \times \text{PON} + C_0$ |              |              | POC= $A_1 \times \text{PON}$ |              | POC= $A_2 \times \text{PON}^{B_2}$ |              |              | POC/PON  | N     |
|--------------|------------------------------------|--------------|--------------|------------------------------|--------------|------------------------------------|--------------|--------------|----------|-------|
|              | $A_0$                              | $C_0$        | $R^2$        | $A_1$                        | $R^2$        | $A_2$                              | $B_2$        | $R^2$        |          |       |
| 80-90        | 8.828                              | 0.080        | 0.772        | 9.294                        | 0.767        | 6.211                              | 0.835        | 0.832*       | 12.2±7.5 | 958   |
| 70-80        | 7.081                              | 0.221        | 0.932*       | 7.149                        | 0.931        | 6.573                              | 0.866        | 0.896        | 9.4±6.4  | 2321  |
| 60-70        | 11.961                             | 6.833        | 0.915        | 11.436                       | 0.907        | 7.131                              | 1.105        | 0.961*       | 7.6±2.7  | 211   |
| 50-60        | 8.289                              | -0.142       | 0.835        | 8.262                        | 0.835        | 7.547                              | 1.016        | 0.937*       | 8.3±5.0  | 776   |
| 40-50        | 5.929                              | 1.486        | 0.850        | 6.401                        | 0.836        | 7.547                              | 0.872        | 0.875*       | 8.7±4.5  | 4913  |
| 30-40        | 6.800                              | -1.126       | 0.881        | 6.582                        | 0.879        | 6.399                              | 0.948        | 0.911*       | 6.7±2.7  | 23441 |
| 20-30        | 5.197                              | 0.340        | 0.959*       | 5.336                        | 0.956        | 5.528                              | 0.903        | 0.870        | 6.6±2.8  | 2776  |
| 10-20        | 6.920                              | 2.496        | 0.876        | 7.038                        | 0.876        | 7.488                              | 0.974        | 0.953*       | 7.9±4.0  | 4335  |
| 0-10         | 5.900                              | 0.460        | 0.905*       | 6.448                        | 0.890        | 6.379                              | 0.897        | 0.853        | 7.5±2.6  | 1004  |
| 0-10         | 7.607                              | 0.345        | 0.836*       | 8.100                        | 0.831        | 7.617                              | 0.905        | 0.792        | 8.7±3.0  | 898   |
| 10-20        | 6.190                              | 0.961        | 0.895*       | 7.016                        | 0.869        | 7.216                              | 0.826        | 0.864        | 8.5±3.2  | 749   |
| 20-30        | 5.521                              | 1.120        | 0.896        | 5.994                        | 0.883        | 6.823                              | 0.830        | 0.936*       | 7.4±2.2  | 494   |
| 30-40        | 6.621                              | 0.362        | 0.951*       | 6.834                        | 0.948        | 6.610                              | 0.749        | 0.887        | 8.7±4.1  | 283   |
| 40-50        | 14.909                             | -5.115       | 0.881        | 13.967                       | 0.860        | 7.646                              | 0.918        | 0.941*       | 8.7±3.6  | 1191  |
| 50-60        | 6.133                              | 0.577        | 0.898        | 6.585                        | 0.888        | 6.945                              | 0.910        | 0.965*       | 8.3±3.5  | 973   |
| 60-70        | 5.984                              | 1.424        | 0.930        | 6.025                        | 0.930        | 7.349                              | 0.889        | 0.939*       | 7.6±3.9  | 16002 |
| 70-80        | 8.395                              | -5.181       | 0.928        | 7.849                        | 0.917        | 7.961                              | 0.868        | 0.973*       | 8.0±3.4  | 1858  |
| mean         | 7.545                              | 0.302        | 0.891        | 7.666                        | 0.882        | 6.998                              | 0.901        | 0.905        |          |       |
| <b>STDEV</b> | <b>2.498</b>                       | <b>2.658</b> | <b>0.047</b> | <b>2.169</b>                 | <b>0.048</b> | <b>0.645</b>                       | <b>0.081</b> | <b>0.052</b> |          |       |

Table S3 Relationship between PON and POC for each depth interval in the southern and northern hemispheres. Three mathematical functions were used to fit the relationship between PON and POC. The parameters and determined coefficients of each function are listed in the table.

| Northern | POC= $A_0 \times \text{PON} + C_0$ | POC= $A_1 \times \text{PON}$ | POC= $A_2 \times \text{PON}^{B_2}$ | POC/PON | N |
|----------|------------------------------------|------------------------------|------------------------------------|---------|---|
|----------|------------------------------------|------------------------------|------------------------------------|---------|---|

|              | $A_0$        | $C_0$        | $R^2$        | $A_1$        | $R^2$        | $A_2$        | $B_2$        | $R^2$        |         |       |
|--------------|--------------|--------------|--------------|--------------|--------------|--------------|--------------|--------------|---------|-------|
| 0-5m         | 5.534        | 3.078        | 0.898        | 5.867        | 0.889        | 7.493        | 0.897        | 0.941*       | 6.9±2.3 | 6476  |
| 5-10m        | 5.762        | 3.276        | 0.884*       | 6.268        | 0.871        | 8.664        | 0.801        | 0.868        | 6.7±2.1 | 3689  |
| 10-20m       | 6.347        | 0.438        | 0.936        | 6.411        | 0.935        | 7.208        | 0.878        | 0.948*       | 7.0±2.8 | 3754  |
| 20-80m       | 8.003        | -3.386       | 0.914        | 7.650        | 0.908        | 7.602        | 0.902        | 0.959*       | 7.1±3.4 | 11511 |
| >80m         | 7.173        | -0.610       | 0.967        | 7.086        | 0.966        | 7.690        | 0.856        | 0.969*       | 8.4±6.5 | 15384 |
| mean         | 7.110        | 0.646        | 0.898        | 7.002        | 0.897        | 6.675        | 0.956        | 0.934        |         |       |
| <b>STDEV</b> | <b>0.358</b> | <b>0.986</b> | <b>0.020</b> | <b>0.293</b> | <b>0.021</b> | <b>0.106</b> | <b>0.035</b> | <b>0.011</b> |         |       |

| Southern     | $POC=A_0 \times PON + C_0$ |              |              | $POC=A_1 \times PON$ |              | $POC=A_2 \times PON^{B_2}$ |              |              | POC/PON | N    |
|--------------|----------------------------|--------------|--------------|----------------------|--------------|----------------------------|--------------|--------------|---------|------|
|              | $A_0$                      | $C_0$        | $R^2$        | $A_1$                | $R^2$        | $A_2$                      | $B_2$        | $R^2$        |         |      |
| 0-5m         | 7.027                      | 0.681        | 0.877        | 6.966                | 0.876        | 7.533                      | 0.883        | 0.944*       | 7.9±4.4 | 5274 |
| 5-10m        | 6.410                      | 0.377        | 0.903        | 6.440                | 0.902        | 7.482                      | 0.877        | 0.938*       | 7.8±4.5 | 2329 |
| 10-20m       | 5.516                      | 3.142        | 0.865        | 5.670                | 0.861        | 7.560                      | 0.882        | 0.942*       | 7.9±5.0 | 3198 |
| 20-80m       | 6.366                      | 0.480        | 0.953*       | 6.379                | 0.953        | 7.356                      | 0.888        | 0.945        | 7.8±4.4 | 6758 |
| >80m         | 5.274                      | 2.534        | 0.909        | 5.335                | 0.907        | 7.200                      | 0.891        | 0.947*       | 8.1±4.9 | 4940 |
| mean         | 6.119                      | 1.443        | 0.901        | 6.158                | 0.900        | 7.426                      | 0.884        | 0.943        |         |      |
| <b>STDEV</b> | <b>0.716</b>               | <b>1.296</b> | <b>0.034</b> | <b>0.651</b>         | <b>0.035</b> | <b>0.149</b>               | <b>0.005</b> | <b>0.004</b> |         |      |

Table S4 Relationship between PON and POC and offshore distance in the southern and northern hemispheres. Three mathematical functions were used to fit the relationship between PON and POC. The parameters and determined coefficients of each function are listed in the table.

| Northern   | $POC=A_0 \times PON + C_0$ |        |        | $POC=A_1 \times PON$ |       | $POC=A_2 \times PON^{B_2}$ |       |        | POC/PO<br>N | N    |
|------------|----------------------------|--------|--------|----------------------|-------|----------------------------|-------|--------|-------------|------|
|            | $A_0$                      | $C_0$  | $R^2$  | $A_1$                | $R^2$ | $A_2$                      | $B_2$ | $R^2$  |             |      |
| 5 km       | 7.059                      | -1.326 | 0.937  | 6.852                | 0.935 | 6.471                      | 1.003 | 0.957* | 6.6±1.4     | 3131 |
| 5-10 km    | 8.059                      | 2.586  | 0.887  | 7.750                | 0.883 | 6.684                      | 0.979 | 0.958* | 6.8±2.0     | 1385 |
| 10-15 km   | 8.424                      | -5.191 | 0.926  | 7.815                | 0.914 | 7.056                      | 0.955 | 0.962* | 7.0±2.1     | 1093 |
| 15-20 km   | 6.839                      | -0.701 | 0.942  | 6.696                | 0.941 | 6.658                      | 0.951 | 0.945* | 6.7±2.0     | 1146 |
| 20-30 km   | 6.866                      | -0.772 | 0.932  | 6.723                | 0.931 | 6.993                      | 0.879 | 0.934* | 7.3±3.2     | 2480 |
| 30-40 km   | 6.594                      | -0.182 | 0.932* | 6.555                | 0.932 | 6.796                      | 0.903 | 0.924  | 6.9±2.9     | 1880 |
| 40-50 km   | 7.096                      | 0.915  | 0.882  | 7.143                | 0.882 | 7.358                      | 0.963 | 0.953* | 7.7±3.8     | 3766 |
| 50-75 km   | 8.520                      | -1.832 | 0.820  | 8.127                | 0.813 | 6.994                      | 0.874 | 0.944* | 8.6±5.1     | 1610 |
| 75-100 km  | 6.275                      | 0.333  | 0.846  | 6.357                | 0.845 | 6.592                      | 0.928 | 0.941* | 7.4±3.7     | 1020 |
| 100-125 km | 6.530                      | 0.005  | 0.935  | 6.530                | 0.935 | 6.695                      | 0.864 | 0.936* | 8.1±4.4     | 966  |
| 125-150 km | 6.189                      | 0.762  | 0.931* | 6.395                | 0.927 | 6.967                      | 0.935 | 0.930  | 7.9±4.6     | 582  |

|              |              |              |              |              |              |              |              |              |         |       |
|--------------|--------------|--------------|--------------|--------------|--------------|--------------|--------------|--------------|---------|-------|
| 150-200 km   | 8.367        | 2.994        | 0.966*       | 8.146        | 0.962        | 6.535        | 0.939        | 0.936        | 7.1±3.2 | 1001  |
| 200-300 km   | 6.280        | 0.067        | 0.933*       | 6.271        | 0.933        | 6.451        | 0.893        | 0.919        | 7.5±4.4 | 1776  |
| 300-500 km   | 7.869        | 0.574        | 0.821        | 7.784        | 0.821        | 7.068        | 0.893        | 0.898*       | 8.7±5.6 | 3317  |
| 500-800 km   | 7.454        | 0.741        | 0.841        | 7.522        | 0.841        | 7.760        | 0.924        | 0.939*       | 8.9±4.9 | 2112  |
| 800-1100 km  | 6.220        | 1.857        | 0.908        | 6.326        | 0.906        | 7.183        | 0.998        | 0.945*       | 7.7±3.3 | 857   |
| >1100 km     | 5.826        | 0.493        | 0.855        | 5.918        | 0.854        | 6.243        | 0.929        | 0.900*       | 6.9±3.6 | 13184 |
| North        | 7.103        | 0.881        | 0.893        | 7.004        | 0.892        | 6.656        | 0.955        | 0.932*       | 7.5±4.6 | 41297 |
| mean         | 7.086        | 0.078        | 0.900        | 6.995        | 0.897        | 6.853        | 0.930        | 0.937        |         |       |
| <b>STDEV</b> | <b>0.877</b> | <b>1.851</b> | <b>0.047</b> | <b>0.719</b> | <b>0.047</b> | <b>0.376</b> | <b>0.042</b> | <b>0.018</b> |         |       |

| Southern     | POC=A <sub>0</sub> ×PON+C <sub>0</sub> |                |                | POC=A <sub>1</sub> ×PON |                | POC=A <sub>2</sub> ×PON <sup>B<sub>2</sub></sup> |                |                | POC/PON  | N     |
|--------------|----------------------------------------|----------------|----------------|-------------------------|----------------|--------------------------------------------------|----------------|----------------|----------|-------|
|              | A <sub>0</sub>                         | C <sub>0</sub> | R <sup>2</sup> | A <sub>1</sub>          | R <sup>2</sup> | A <sub>2</sub>                                   | B <sub>2</sub> | R <sup>2</sup> |          |       |
| 5 km         | 5.534                                  | 3.078          | 0.898          | 5.867                   | 0.889          | 7.493                                            | 0.897          | 0.941*         | 8.3±10.1 | 4536  |
| 5-10 km      | 5.762                                  | 3.276          | 0.884*         | 6.268                   | 0.871          | 8.664                                            | 0.801          | 0.868          | 7.6±3.1  | 598   |
| 10-15 km     | 5.634                                  | 2.570          | 0.952*         | 5.912                   | 0.945          | 7.485                                            | 0.878          | 0.928          | 7.6±3.8  | 1196  |
| 15-20 km     | 5.156                                  | 4.301          | 0.853          | 5.530                   | 0.838          | 7.699                                            | 0.854          | 0.912*         | 8.2±5.5  | 1378  |
| 20-30 km     | 7.687                                  | -2.723         | 0.965*         | 7.645                   | 0.965          | 7.165                                            | 0.875          | 0.945          | 7.6±4.0  | 1794  |
| 30-40 km     | 6.721                                  | 0.793          | 0.825          | 6.686                   | 0.825          | 7.261                                            | 0.878          | 0.939*         | 7.5±3.5  | 1222  |
| 40-50 km     | 6.772                                  | 2.072          | 0.969*         | 6.756                   | 0.969          | 7.501                                            | 0.870          | 0.951          | 8.3±4.8  | 733   |
| 50-75 km     | 6.200                                  | 0.915          | 0.919          | 6.323                   | 0.918          | 7.409                                            | 0.853          | 0.932*         | 8.0±4.4  | 814   |
| 75-100 km    | 3.614                                  | 8.133          | 0.701          | 4.027                   | 0.648          | 7.479                                            | 0.877          | 0.946*         | 7.9±4.3  | 910   |
| 100-125 km   | 5.471                                  | 2.559          | 0.948*         | 5.488                   | 0.947          | 7.018                                            | 0.896          | 0.937          | 7.7±4.9  | 726   |
| 125-150 km   | 5.665                                  | 1.567          | 0.975*         | 5.698                   | 0.975          | 6.957                                            | 0.899          | 0.947          | 7.4±3.6  | 511   |
| 150-200 km   | 4.416                                  | 4.793          | 0.918          | 4.609                   | 0.903          | 6.996                                            | 0.890          | 0.964*         | 7.7±4.2  | 316   |
| 200-300 km   | 6.062                                  | 1.003          | 0.903          | 6.195                   | 0.902          | 7.065                                            | 0.889          | 0.925*         | 7.4±4.2  | 541   |
| 300-500 km   | 6.347                                  | 0.438          | 0.936          | 6.411                   | 0.935          | 7.208                                            | 0.878          | 0.948*         | 7.4±3.8  | 280   |
| 500-800 km   | 8.003                                  | -3.386         | 0.914          | 7.650                   | 0.908          | 7.602                                            | 0.902          | 0.959*         | 7.9±3.8  | 2207  |
| 800-1100 km  | 7.173                                  | -0.610         | 0.967          | 7.086                   | 0.966          | 7.690                                            | 0.856          | 0.969*         | 8.6±3.7  | 3985  |
| >1100 km     | 5.719                                  | 1.092          | 0.840          | 6.010                   | 0.831          | 7.142                                            | 0.895          | 0.939*         | 8.2±3.5  | 164   |
| South        | 5.974                                  | 1.528          | 0.913          | 6.033                   | 0.912          | 7.373                                            | 0.890          | 0.948*         | 7.8±3.8  | 21911 |
| mean         | 5.996                                  | 1.757          | 0.904          | 6.127                   | 0.896          | 7.402                                            | 0.876          | 0.938          |          |       |
| <b>STDEV</b> | <b>1.098</b>                           | <b>2.720</b>   | <b>0.070</b>   | <b>0.942</b>            | <b>0.080</b>   | <b>0.406</b>                                     | <b>0.025</b>   | <b>0.023</b>   |          |       |

Table S5 Relationship between PON and POC for different lakes. Three mathematical functions were used to fit the relationship between PON and POC. The parameters and determined coefficients of each function are listed in the table. Table S5 list the lake names and their abbreviations.

| Items        | POC= $A_0 \times \text{PON} + C_0$ |               |              | POC= $A_1 \times \text{PON}$ |              | POC= $A_2 \times \text{PON}^{B_2}$ |              |              | POC/PON   | N    |
|--------------|------------------------------------|---------------|--------------|------------------------------|--------------|------------------------------------|--------------|--------------|-----------|------|
|              | $A_0$                              | $C_0$         | $R^2$        | $A_1$                        | $R^2$        | $A_2$                              | $B_2$        | $R^2$        |           |      |
| MDV          | 7.689                              | 9.426         | 0.717*       | 9.686                        | 0.623        | 16.217                             | 0.599        | 0.611        | 14.7±10.1 | 3024 |
| ALa          | 8.418                              | 4.139         | 0.766        | 9.157                        | 0.755        | 11.490                             | 0.858        | 0.921*       | 11.6±6.8  | 2037 |
| NL           | 7.345                              | 15.668        | 0.940*       | 7.913                        | 0.924        | 13.340                             | 0.842        | 0.935        | 10.4±2.8  | 119  |
| NA           | 7.700                              | 18.412        | 0.925        | 7.966                        | 0.921        | 12.963                             | 0.871        | 0.926*       | 10.0±2.9  | 133  |
| HkL          | 7.499                              | 3.009         | 0.941*       | 7.566                        | 0.941*       | 8.384                              | 0.966        | 0.925        | 8.6±3.9   | 21   |
| LCG          | 12.869                             | -1.856        | 0.946*       | 12.826                       | 0.946*       | 13.473                             | 0.971        | 0.920        | 12.8±3.1  | 93   |
| KkL          | 6.435                              | 24.082        | 0.889        | 6.818                        | 0.884        | 9.582                              | 0.916        | 0.917*       | 7.1±1.5   | 4678 |
| BwL          | 7.048                              | 7.449         | 0.868*       | 8.202                        | 0.839        | 11.606                             | 0.811        | 0.844        | 8.8±1.6   | 79   |
| HL           | 10.101                             | -0.468        | 0.797*       | 9.691                        | 0.796        | 9.448                              | 0.843        | 0.731        | 9.7±2.2   | 28   |
| BkL          | 7.912                              | -0.412        | 0.963*       | 7.765                        | 0.963        | 7.812                              | 0.979        | 0.954        | 7.8±0.9   | 64   |
| GL           | 7.800                              | 11.132        | 0.933        | 7.967                        | 0.931        | 10.745                             | 0.932        | 0.949*       | 9.6±2.7   | 175  |
| ThL          | 7.274                              | -103.900      | 0.805*       | 5.757                        | 0.742        | 1.278                              | 1.220        | 0.492        | 4.0±4.0   | 82   |
| GLG          | 1.606                              | 3.994         | 0.190        | 2.612                        | 0.066        | 4.615                              | 0.247        | 0.089        | 5.1±7.7   | 163  |
| SkR          | 7.498                              | 2.433         | 0.863*       | 7.700                        | 0.863*       | 8.326                              | 0.967        | 0.855        | 7.7±0.7   | 956  |
| IPPR         | 5.773                              | 107.960       | 0.391        | 7.310                        | 0.151        | 34.735                             | 0.731        | 0.518*       | 28.7±18.6 | 223  |
| Mean         | 7.531                              | 6.738         | 0.796*       | 7.929                        | 0.756        | 11.601                             | 0.850        | 0.772        |           |      |
| <b>STDEV</b> | <b>2.328</b>                       | <b>40.756</b> | <b>0.221</b> | <b>2.181</b>                 | <b>0.280</b> | <b>7.393</b>                       | <b>0.215</b> | <b>0.247</b> |           |      |

Table S6 Parallel table of lake names and their abbreviations.

| Name | Full name                 | Nation     | Latitude |
|------|---------------------------|------------|----------|
| ALa  | Alaskan Lakes             | USA        | 68.59    |
| GLG  | Great Lakes Group         | USA        | 45.52    |
| SkR  | Skidaway River            | USA        | 32.43    |
| NA   | Northern American Lakes   | USA        | 43.81    |
| LCG  | Lacustrine Central Group  | USA        | 45.42    |
| IPPR | Ipswich and Parker rivers | USA        | 42.61    |
| HkL  | Hokkaido Lakes            | Japan      | 43.54    |
| KkL  | Lake Kasumigaura          | Japan      | 36.15    |
| BwL  | Lake Biwa                 | Japan      | 35.33    |
| NL   | Norwegian Lakes           | Norway     | 60.69    |
| MDV  | McMurdo Dry Valleys Lakes | Antarctica | -77.09   |
| HL   | Lake Hovsgol              | Mongolia   | 51.12    |
| BkL  | Lake Baikal               | Russia     | 53.99    |
| GL   | Green Lake                | Canada     | 39.99    |
| ThL  | Lake Taihu                | China      | 31.18    |

Figure S1 Global distribution of paired samples of POC and PON for each depth interval, the original map data of world vector downloaded from <http://www.natureearthdata.com/>.

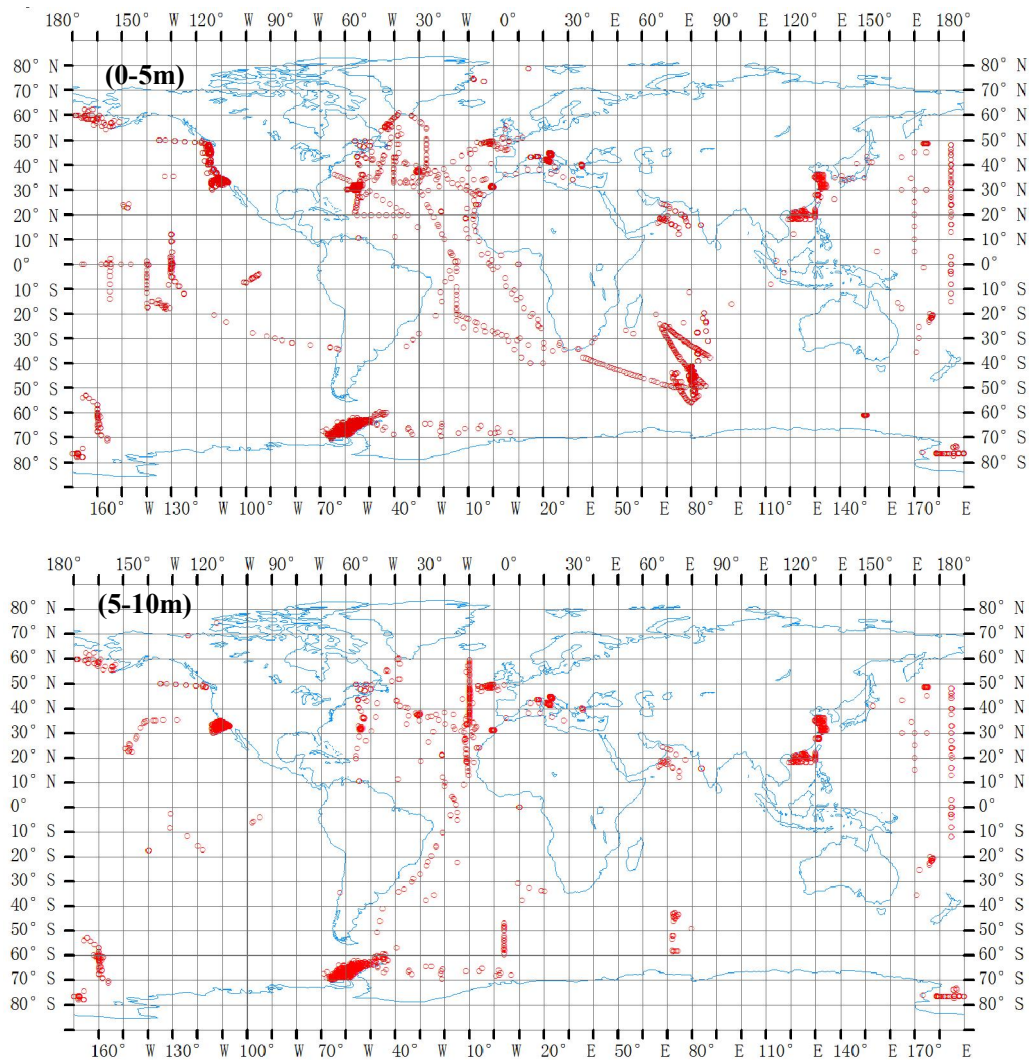

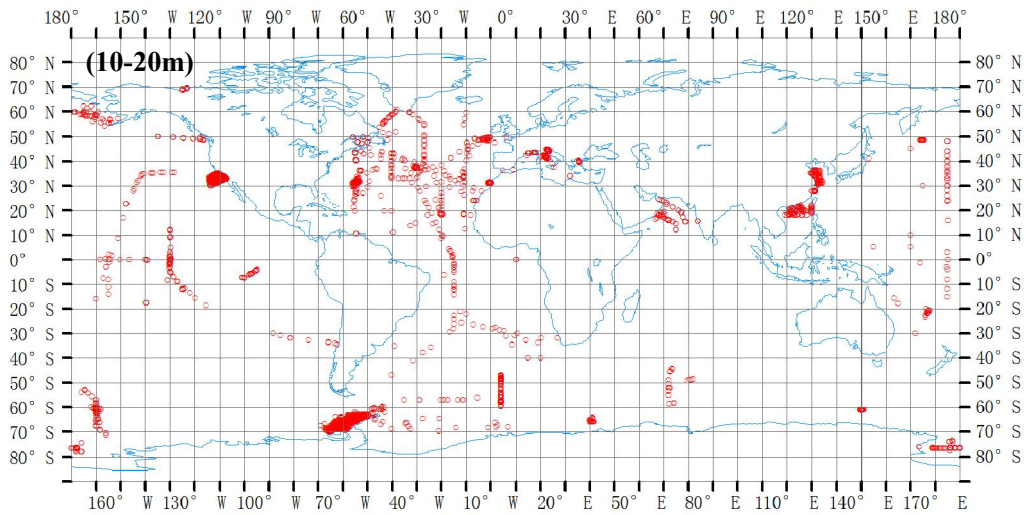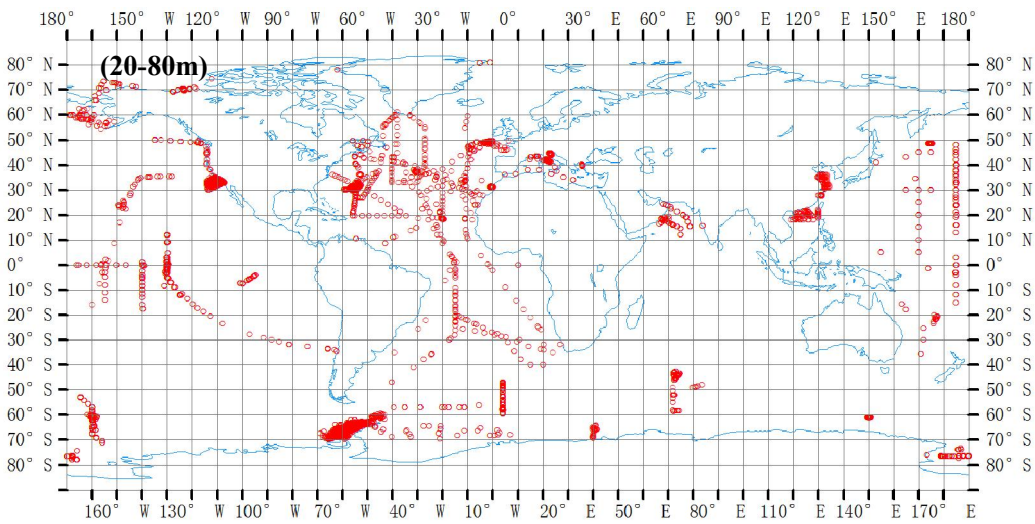



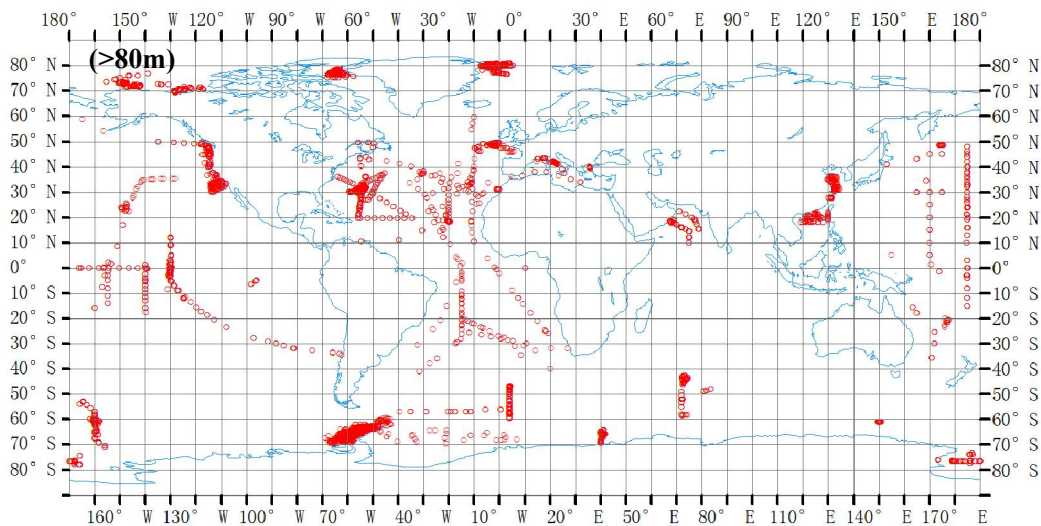

Figure S2 The variation of POC/PON with the distance from the shore to open ocean. The relationships between POC/PON and distance are  $POC/PON=0.0024*D+7.1764$  ( $R^2=0.519$ , North hemisphere) and  $POC/PON=0.0004*D+7.7346$  ( $R^2=0.118$ , South hemisphere).

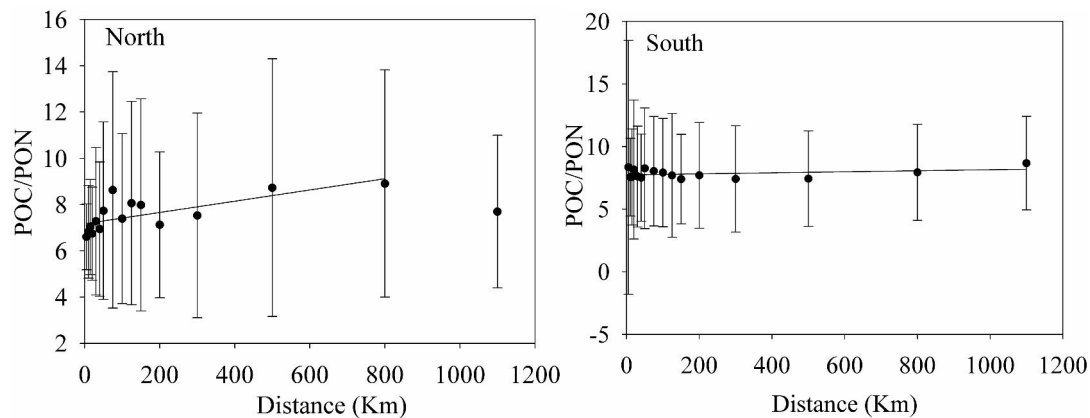

Supplement: Supplementary file 1 [file bg-2017-68-supplement.pdf]
